# Supplementary material for: Effectiveness of Workplace Nutrition Programs on Anemia Status among Female Readymade Garment Workers in Bangladesh: A Program Evaluation
Source: PubMed Central journal article supplement (PMC6627420; doi:10.3390/nu11061259), 2019-06-03
Supplement: nutrients-11-01259-s001.pdf [file nutrients-11-01259-s001.pdf]

Supplementary file 1

**Table S1.** Composition of regular and fortified rice lunch meals served at readymade garment factories

|                                  | Servings per week × serving size (grams)                        |                                                                           | Average grams per day |                 |
|----------------------------------|-----------------------------------------------------------------|---------------------------------------------------------------------------|-----------------------|-----------------|
|                                  | Regular lunch*                                                  | Fortified lunch                                                           | Regular lunch         | Fortified lunch |
| <b>Rice*</b>                     | 375 g × 6 days                                                  | 375 g × 6 days                                                            | 375 g                 | 375 g           |
| <b>Lentil* †</b>                 | 150 g × 6 days                                                  | 150 g × 6 days                                                            | 150 g                 | 150 g           |
| <b>Meat/poultry/fish</b>         | 48 g meat/poultry or 75 g fish × 3 days                         | 90 g × 3 days minimum                                                     | 29 g                  | 45 g            |
| <b>Egg</b>                       | 50 g × 1.5                                                      | 90 g × 1 day                                                              | 13 g                  | 15 g            |
| <b>Total animal source foods</b> |                                                                 |                                                                           | 42 g                  | 60 g            |
| <b>Green leafy vegetable</b>     | -                                                               | 90g × 6 days                                                              | 0 g                   | 90 g            |
| <b>Other vegetables</b>          | 82 g (served with meat dish) or 135 g (no meat served) × 3 days | 75 g (served with meat dish) × 2 days and 150 g (no meat served) × 3 days | 54 g                  | 50 g            |
| <b>Total vegetables</b>          |                                                                 |                                                                           | 54 g                  | 140 g           |
| <b>Vegetable oil</b>             | 10 g × 6 days                                                   | 10 g × 6 days                                                             | 10 g                  | 10 g            |
| <b>Iron/folate supplement</b>    | -                                                               | 1                                                                         | n/a                   | n/a             |

\* Rice and lentils were provided in unlimited quantities to workers

† The thickness of the lentil was increased by doubling the content of lentils per volume of cooked lentil

**Table S2.** Comparison of the regular lunch menu and the fortified lunch menu according to the Dietary Guidelines for Bangladesh 2013 [1]\*

|                                       | DGB 2013 Recommendation [1] |                         | Regular lunch menu |                      | Fortified lunch menu |                      |
|---------------------------------------|-----------------------------|-------------------------|--------------------|----------------------|----------------------|----------------------|
|                                       | Per day                     | Applied to lunch meal** | Amount provided    | Meets recommendation | Amount provided      | Meets recommendation |
| <b>Energy, kcal</b>                   | 2200                        | 880                     | 761                | †                    | 881                  | †                    |
| <b>Fat, % energy</b>                  | 15-30%                      | 15-30%                  | 19%                | Yes                  | 20%                  | Yes                  |
| <b>Protein, % energy</b>              | ~10%                        | ~10%                    | 12%                | Yes                  | 15%                  | Yes                  |
| <b>Animal source foods, grams</b>     | 260                         | 104                     | 42                 | No                   | 60                   | No                   |
| <b>Fruits, grams</b>                  | 100                         | 40                      | 0                  | No                   | 0                    | No                   |
| <b>Leafy vegetables, grams</b>        | ≥ 100                       | ≥ 40                    | 0                  | No                   | 90                   | Yes                  |
| <b>Other vegetables, grams</b>        | ≥ 200                       | ≥ 80                    | 54                 | No                   | 50                   | No                   |
| <b>Fruits &amp; vegetables, grams</b> | ≥ 400                       | ≥ 160                   | 54                 | No                   | 140                  | No                   |
| <b>Sugar, grams</b>                   | ≤ 20                        | ≤ 8                     | 0                  | Yes                  | 0                    | Yes                  |

\*1. BIRDEM. Dietary Guidelines for Bangladesh; Dhaka, Bangladesh, 2013.

\*\* Based on the assumption that the lunch meal would provide 40% of the total day's intake

†As rice and lentil were consumed without limit, the adequacy of energy provided by the menu could not be assessed. Kcal shown for regular and fortified menus used the estimated serving size of 375 grams cooked rice and 150 grams cooked lentil as shown in Table S1

**Table S3.** Estimated energy and nutrient content of regular and fortified lunch menu served in garment factories

| Mean nutrient intake per day | Regular lunch                           | Fortified lunch + weekly iron/folate supplement * | Factory without lunch + twice weekly iron/folate supplement | Regular lunch     | Fortified lunch + weekly iron/folate supplement * | Factory without lunch + twice weekly iron/folate supplement |
|------------------------------|-----------------------------------------|---------------------------------------------------|-------------------------------------------------------------|-------------------|---------------------------------------------------|-------------------------------------------------------------|
|                              | Average intake per lunch meal / per day |                                                   |                                                             | % Recommendation‡ |                                                   |                                                             |
| <b>Energy, kcal</b>          | 761                                     | 881                                               | n/a                                                         | 36                | 42                                                | n/a                                                         |
| <b>Protein, g</b>            | 22                                      | 33                                                | n/a                                                         | 12 **             | 15 **                                             | n/a                                                         |
| <b>Fat, g</b>                | 16                                      | 19                                                | n/a                                                         | 19 **             | 20 **                                             | n/a                                                         |
| <b>Iron, mg</b>              | 2.7                                     | 22.6                                              | 17                                                          | 5 / 9 †           | 38 / 77 †                                         | 29 / 58 †                                                   |
| <b>Zinc, mg</b>              | 3.1                                     | 8.2                                               | n/a                                                         | 32                | 84                                                | n/a                                                         |
| <b>Folate, µg</b>            | 93                                      | 584                                               | 114                                                         | 23                | 146                                               | 29                                                          |
| <b>Vitamin B12, µg</b>       | 0.68                                    | 2.13                                              | n/a                                                         | 28                | 89                                                | n/a                                                         |
| <b>Vitamin A, µg RAE</b>     | 51                                      | 636                                               | n/a                                                         | 10                | 127                                               | n/a                                                         |

\*Assumes Fortified lunch meal as summarized in Table S1, and substituting regular rice with multi-nutrient fortified rice and vitamin A-fortified vegetable oil, plus the daily equivalent of a once weekly iron/folate supplement (60 mg iron and 400 µg folate per weekly dose). The additional amount of iron/folate derived from the twice-weekly supplement without lunch is also shown.

\*\*Expressed as recommended protein or fat content as % energy content

‡ Recommendations are the WHO/FAO Recommended Nutrient Intakes for micronutrients and recommendations for energy[2] and percent energy from protein and fat of the Dietary Guidelines for Bangladesh 2013[1]

† % RNI for iron shown for low / moderate bioavailability diets

Reference:

1. BIRDEM. Dietary Guidelines for Bangladesh; Dhaka, Bangladesh, 2013.
2. Food and Agriculture Organization of the United Nations; World Health Organization; United Nations University. Human energy requirements: Report of a Joint FAO/WHO/UNU Expert Consultation, Rome, Italy, 17-24 October 2001; FAO: Rome, 2004.

**Table S4.** Sensitivity analysis for replacement respondents at lunch meal intervention factory

| Indicators                     | Before replacement | After replacement | Overall        | P-value |
|--------------------------------|--------------------|-------------------|----------------|---------|
| Respondents age, mean $\pm$ SD | 27.1 $\pm$ 4.9     | 28.4 $\pm$ 5.3    | 27.8 $\pm$ 5.1 | 0.69    |
| Wealth index, n(%)             |                    |                   |                |         |
| Lowest                         | 90 (17)            | 93 (18.2)         | 183 (17.6)     |         |
| Second                         | 99 (18.7)          | 91 (17.8)         | 190 (18.3)     |         |
| Middle                         | 97 (18.3)          | 105 (20.6)        | 202 (19.4)     | 0.815   |
| Fourth                         | 110 (20.8)         | 103 (20.2)        | 213 (20.5)     |         |
| Highest                        | 134 (25.3)         | 118 (23.1)        | 252 (24.2)     |         |
| Marital status, n (%)          |                    |                   |                |         |
| Married                        | 426 (80.4)         | 422 (82.8)        | 848 (81.5)     |         |
| Unmarried                      | 65 (12.3)          | 51 (10)           | 116 (11.2)     | 0.502   |
| Divorced/ separated/widow      | 39 (7.4)           | 37 (7.3)          | 76 (7.3)       |         |
| Education, n (%)               |                    |                   |                |         |
| No                             | 72 (13.6)          | 70 (13.7)         | 142 (13.7)     | 0.947   |
| Yes                            | 458 (86.4)         | 440 (86.3)        | 898 (86.4)     |         |
| Place of residence, n (%)      |                    |                   |                |         |
| Rural                          | 97 (18.3)          | 97 (19)           | 194 (18.7)     | 0.766   |
| Urban                          | 433 (81.7)         | 413 (81)          | 846 (81.4)     |         |
| Religion, n(%)                 |                    |                   |                |         |
| Islam                          | 495 (93.4)         | 482 (94.5)        | 977 (93.9)     |         |
| Hindu                          | 33 (6.2)           | 27 (5.3)          | 60 (5.8)       | 0.697   |
| Christian                      | 2 (0.4)            | 1 (0.2)           | 3 (0.3)        |         |
| Household ownership, n (%)     |                    |                   |                |         |
| Own house                      | 54 (10.2)          | 56 (11)           | 110 (10.6)     | 0.678   |
| Rented house/ shared           | 476 (89.8)         | 454 (89)          | 930 (89.4)     |         |
| Working overtime, n (%)        |                    |                   |                |         |
| No                             | 19 (3.6)           | 26 (5.1)          | 45 (4.3)       | 0.231   |
| Yes                            | 511 (96.4)         | 484 (94.9)        | 995 (95.7)     |         |

Continuous variables are presented by mean  $\pm$  SD and categorical variables are presented as the percentage of participants (%).

**Table S5.** DID analysis reporting both replacement and non-replacement participant results: Effect of intervention on anemia reduction (% of women with any anemia)

| Indicator                            | Baseline |      |              | Endline |      |              | Unadjusted DID (E-B) | Adjusted DID <sup>1</sup> |
|--------------------------------------|----------|------|--------------|---------|------|--------------|----------------------|---------------------------|
|                                      | I        | C    | B=Diff (I-C) | I       | C    | E=Diff (I-C) |                      |                           |
| <u>With replacement participants</u> |          |      |              |         |      |              |                      |                           |
| Lunch meal (A vs B)                  | 60.7     | 33.2 | 27.5         | 36.9    | 41.2 | -4.3         | -31.8***             | -32.4***                  |
| Non meal (C vs D)                    | 47.9     | 36.3 | 11.6         | 41.5    | 41.8 | -0.3         | -11.9**              | -11.6**                   |
| <u>Nonreplacement participants</u>   |          |      |              |         |      |              |                      |                           |
| Lunch meal (A vs B)                  | 63.8     | 33.3 | 30.5         | 35.1    | 41.1 | -6.0         | -36.5***             | -37.0***                  |
| Non meal (C vs D)                    | 48.3     | 35.9 | 12.4         | 39.4    | 39.8 | -0.4         | -12.8*               | -12.0**                   |

Abbreviation: I: intervention; C: control. Indicator variable anemia changes are presented as the percentage points (%). Model 1: adjusted for marital status, asset index, household ownership, overtime work hours per month, baseline anemia difference and intracluster correlation (ICC); \*\*\*  $p < 0.0001$ ; \*\*  $p < 0.01$ .

**Table S6.** Changes of characteristics over the baseline to endline survey

| Variables                                       | Lunch meal    |                |        |                |                |        | Non-meal      |               |        |               |                |        |
|-------------------------------------------------|---------------|----------------|--------|----------------|----------------|--------|---------------|---------------|--------|---------------|----------------|--------|
|                                                 | Baseline      |                | P      | Endline        |                | P      | Baseline      |               | P      | Endline       |                | P      |
|                                                 | I (n=326)     | I (n=306)      |        | C (n=328)      | C (n=328)      |        | I (n=328)     | I (n=328)     |        | C (n=328)     | C (n=328)      |        |
| <b>Asset quintile, n (%)</b>                    |               |                |        |                |                |        |               |               |        |               |                |        |
| Poorest                                         | 61 (18.7)     | 65 (21.2)      |        | 93 (28.4)      | 105 (32)       |        | 54 (16.5)     | 47 (14.3)     |        | 50 (15.2)     | 60 (18.3)      |        |
| Poorer                                          | 58 (17.8)     | 60 (19.6)      |        | 86 (26.2)      | 61 (18.6)      |        | 54 (16.5)     | 48 (14.6)     |        | 70 (21.3)     | 75 (22.9)      |        |
| Middle                                          | 63 (19.3)     | 64 (20.9)      | NS     | 61 (18.6)      | 63 (19.2)      | 0.03   | 77 (23.5)     | 60 (18.3)     | NS     | 59 (18)       | 66 (20.1)      | NS     |
| Richer                                          | 59 (18.1)     | 59 (19.3)      |        | 58 (17.7)      | 50 (15.2)      |        | 62 (18.9)     | 80 (24.4)     |        | 69 (21)       | 59 (18)        |        |
| Richest                                         | 85 (26.1)     | 58 (19)        |        | 30 (9.1)       | 49 (14.9)      |        | 81 (24.7)     | 93 (28.4)     |        | 80 (24.4)     | 68 (20.7)      |        |
| <b>Overtime</b>                                 |               |                |        |                |                |        |               |               |        |               |                |        |
| hours in a month, Mean (SD)                     | 33.3 (10.5)   | 49.6 (17)      | <0.001 | 41.1 (9.3)     | 45.5 (8.5)     | <0.001 | 44.6 (19.5)   | 38.6 (20.6)   | <0.001 | 47.4 (12)     | 44.1 (12)      | <0.001 |
| <b>Total Income USD, Median (IQR)</b>           |               |                |        |                |                |        |               |               |        |               |                |        |
| Total Income USD, Median (IQR)                  | 100 (88, 108) | 118 (101, 131) | <0.001 | 108 (100, 113) | 113 (105, 119) | <0.001 | 104 (92, 118) | 102 (92, 113) | NS     | 109 (98, 116) | 113 (104, 124) | <0.001 |
| <b>Total Household Expenditure, Median(IQR)</b> |               |                |        |                |                |        |               |               |        |               |                |        |
| Total Household Expenditure, Median(IQR)        | 94 (85, 106)  | 113 (100, 128) | <0.001 | 100 (88, 113)  | 108 (100, 115) | <0.001 | 101 (88, 114) | 100 (89, 113) | NS     | 106 (93, 113) | 113 (100, 119) | NS     |

Abbreviation: I: intervention; C: control; IQR: interquartile range. Continuous variables are presented by mean ± SD and categorical variables are presented as the percentage of participants (%).
